# Supplementary material for: Electrostatic microfiltration (EM) enriches and recovers viable microorganisms at low-abundance in large-volume samples and enhances downstream detection
Source: Royal Society of Chemistry journal article supplement (doi:10.1039/d4lc00419a), 2024-01-01
Supplement: d4lc00419a1.pdf [file d4lc00419a1.pdf]

## Lab on a Chip

### Supplementary Information

**Title:** Electrostatic Microfiltration (EM) Enriches and Recovers Viable Microorganisms at Low-abundance in Large-volume Samples and Enhances Downstream Detection

**Authors** Yaoping Liu, Joshua J. Raymond, Xiaolin Wu, Patrina Wei Lin Chua, Sharon Yan Han Ling, Chia Ching Chan, Cheryl Chan, Joanne Xin Yi Loh, Melody Xing Yen Song, Matilda Yu Yan Ong, Peiying Ho, Megan E. Mcbee, Stacy L. Springs, Hanry Yu, and Jongyoon Han

The details of precise, efficient, rapid, flexible, easy, controllable, and thin (PERFECT) filter, homemade gadget for positive charge coating, and gadget of package for the electrostatic microfiltration (EM) processing, are shown in Fig. S1.

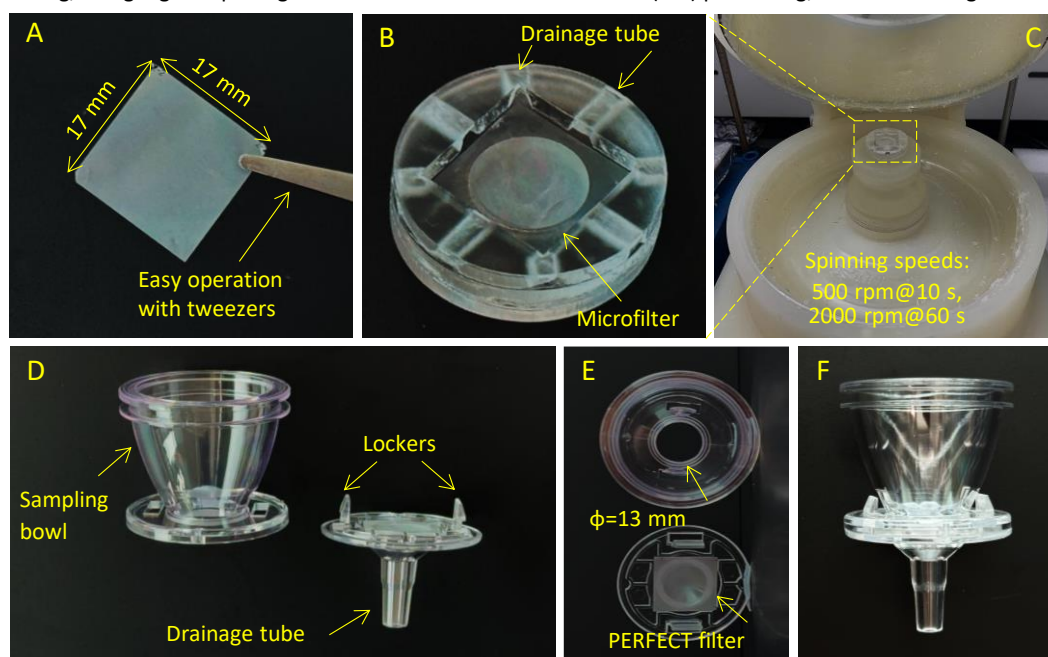

**Fig. S1** PERFECT filter, spinning-based Ca-alginate gel coating and package gadget. A) Photo of PERFECT filter. B) Homemade holder with PERFECT filter for C) Spinning-based positive-charge (Ca-alginate gel) coating. Photos of filtration gadget from D) side and E) top-down views, and F) packaged PERFECT filter for EM processing.

The filter's hydrophilicity after the Ca-alginate gel coating was investigated by measuring the contact angles. As shown in Fig. S2, the reduction of contact angle from 76° to 68° demonstrates a slight increase in hydrophilicity, which is beneficial for electrostatic microfiltration.

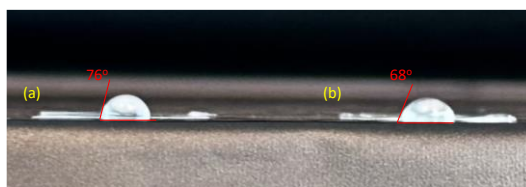

**Fig. S2** The contact angles of H<sub>2</sub>O on the PERFECT filters before (a) and after (b) the alginate-CaCl<sub>2</sub> coating.

The sample-to-result workflows of EM-based sample preparation, conventional centrifugation-based sample preparation, and an unconcentrated raw sampling approach (collecting 40  $\mu$ L from initial raw samples) interfacing with digital amplification-based detection or post-release culture on lysogeny broth (LB) agar plates, were schematically shown in Fig. S3.

Fig. S4 presents the scatter plots of dLAMP signals (copies/ $\mu$ L on the Y-axis) for detection of bacteria in 10 mL LB spiked samples, in correlation with the abundances (CFU/mL on the X-axis) derived from the actual CFU counts obtained by the plating method.

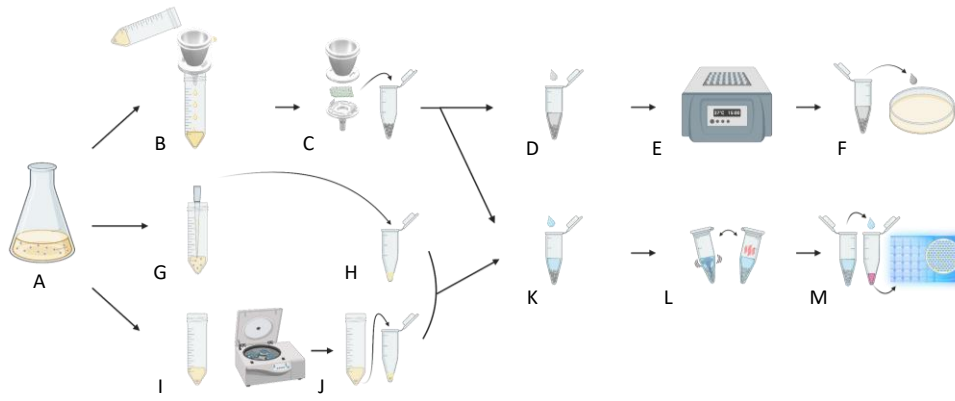

**Fig. S3** Schematic of the workflow of electrostatic microfiltration (EM)-based, centrifugation-based sample preparation and an unconcentrated raw sampling approach, for interfacing with the digital amplification-based detection and culture of released pathogens on agar plates. A) Preparation of samples at desired abundance via spiking. B) Gravity-driven EM processing to capture the pathogens onto the EM-PERFECT filter. C) Transfer the EM-PERFECT filter containing pathogens into a microfuge tube for D–E) release, followed by F) plating and culture. G–H) Direct sampling of 40 µL from 10 mL raw sample. I–J) Centrifugation@10,000g for 10 min, dispose of the supernatant, and resuspension of the pellet into 54 µL nuclease-free H<sub>2</sub>O. K) In-situ lysis via alternative L) heating and vortexing procedures (65°C@6 min, vortexing@1 min, 98°C@2 min, vortexing@1 min). M) Introduction of lysate into the Loop mediated isothermal AMplification (LAMP) master mix, partition, and digital LAMP (dLAMP) running.

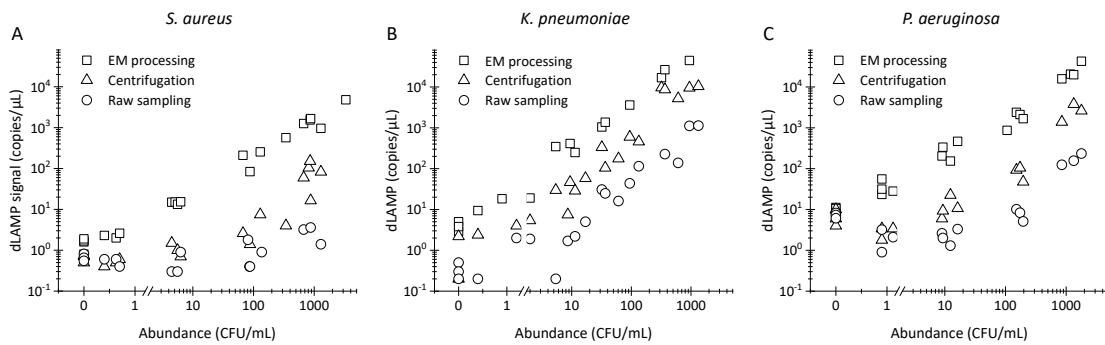

**Fig. S4** The scatter plots of dLAMP signals in correlation with the abundances (derived from actual CFU counts based on the plating method), for detection of bacteria in 10 mL LB spiked samples: A) *S. aureus*, B) *K. pneumoniae*, and C) *P. aeruginosa*.

Fig. S5 presents the evident concentration increment achieved by the EM-based sample preparation (A, D, G), compared to centrifugation-based method (B, E, F) and unconcentrated raw sampling approach (C, F, I). The raw images and scatter plots of positive versus negative signal points/partitions from dLAMP detection are shown here with an abundance at the 100 CFU/mL level as the representative. Each dLAMP reaction consisted of more than 20,000 partitions. The displays presented here show images/data from around 5,000 partitions as the representative.

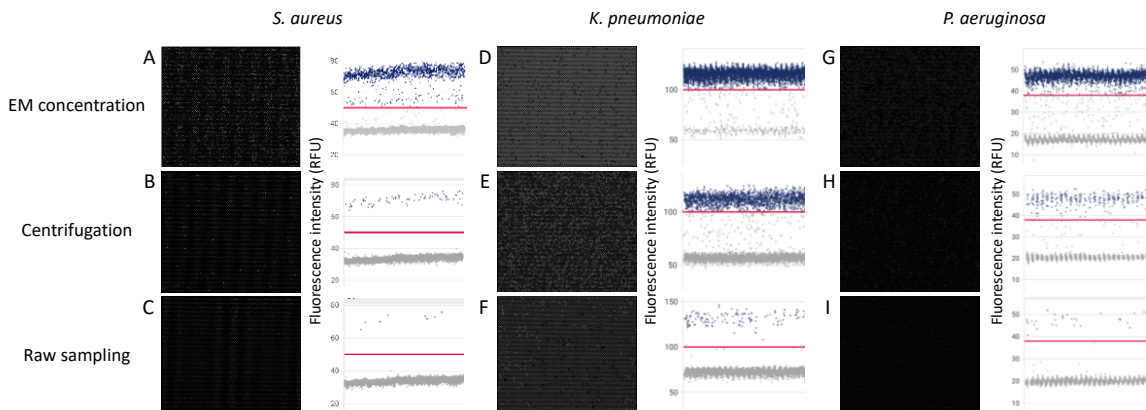

**Fig. S5** The raw images and scatter plots of positive versus negative signal points/partitions from dLAMP detection of bacteria in 10 mL LB samples using different sample preparation methods, with the abundance at the 100 CFU/mL level as the representative: A, B, C) *S. aureus*, D, E, F) *K. pneumoniae*, and G, H, I) *P. aeruginosa*.

**Table S1** dLAMP signals of *P. aeruginosa* detection obtained by EM-based sample preparation (Ca-alginate gel coating with Pluronic F-127 of different concentrations) and abundances derived from CFU counts, for 10 mL FBS spiked samples at the 100 CFU/mL level.

| No. | Abundance (CFU/mL) | dLAMP signal (copies/ $\mu$ L) |                                   |                                   |                                   |
|-----|--------------------|--------------------------------|-----------------------------------|-----------------------------------|-----------------------------------|
|     |                    | Ca-Alginate                    | Plu(1) <sup>a)</sup> -Ca-Alginate | Plu(2) <sup>a)</sup> -Ca-Alginate | Plu(3) <sup>a)</sup> -Ca-Alginate |
| 1   | 153                | 211.4                          | 390.7                             | <b>557.8</b>                      | 337.6                             |
| 2   | 179                | 588.3                          | 998.1                             | <b>1365.9</b>                     | 965.8                             |
| 3   | 66.5               | 226.2                          | 365.8                             | <b>571.2</b>                      | 399.6                             |

<sup>a)</sup> Plu(1), (2), and (3): adding 1%, 2%, and 3% (w/v) Pluronic F-127 into 0.4% (w/v) alginate sodium salt in the preparation of positively charged coating.

**Table S2** Capture efficiencies and actual colony-forming unit (CFU) counts, for 10 mL LB spiked samples.

| No. | Species              | Counted abundance (CFU/mL) | CFU counts (total No.) |               |                          | Capture efficiency (%) |            |
|-----|----------------------|----------------------------|------------------------|---------------|--------------------------|------------------------|------------|
|     |                      |                            | Input                  | Filtrate (EM) | Supernatant (centrifuge) | EM                     | Centrifuge |
| 1   | <i>S. aureus</i>     | 4.5                        | 45                     | 15            | 44                       | 67                     | 2.2        |
| 2   |                      | 5.6                        | 56                     | 13            | 55                       | 77                     | 1.8        |
| 3   |                      | 6.3                        | 63                     | 14            | 61                       | 78                     | 3.2        |
| 4   |                      | 86.5                       | 865                    | 80            | 859                      | 91                     | 0.7        |
| 5   |                      | 87.5                       | 875                    | 40            | 860                      | 95                     | 1.7        |
| 6   |                      | 129                        | 1290                   | 120           | 1275                     | 91                     | 1.2        |
| 7   |                      | 865                        | 8650                   | 260           | 8218                     | 97                     | 5.0        |
| 8   |                      | 875                        | 8750                   | 1070          | 8374                     | 88                     | 4.3        |
| 9   |                      | 1290                       | 12900                  | 1530          | 12380                    | 88                     | 4.0        |
| 1   | <i>K. pneumoniae</i> | 7.6                        | 76                     | 17            | 69                       | 78                     | 9.2        |
| 2   |                      | 9.7                        | 97                     | 35            | 88                       | 64                     | 9.3        |
| 3   |                      | 9.4                        | 94                     | 47            | 89                       | 50                     | 5.3        |
| 4   |                      | 58.8                       | 588                    | 164           | 499                      | 72                     | 15         |
| 5   |                      | 66.8                       | 668                    | 238           | 600                      | 64                     | 10         |
| 6   |                      | 94                         | 940                    | 242           | 878                      | 74                     | 6.6        |
| 7   |                      | 587.5                      | 5875                   | 1367          | 4930                     | 77                     | 16         |
| 8   |                      | 667.5                      | 6675                   | 1448          | 5674                     | 78                     | 15         |
| 9   |                      | 940                        | 9400                   | 3594          | 7144                     | 72                     | 24         |
| 1   | <i>P. aeruginosa</i> | 9                          | 90                     | 35            | 88                       | 61                     | 2.2        |
| 2   |                      | 9.3                        | 93                     | 5             | 92                       | 95                     | 1.1        |
| 3   |                      | 12.4                       | 124                    | 51            | 123                      | 59                     | 0.8        |
| 4   |                      | 196                        | 1960                   | 1066          | 1912                     | 46                     | 2.5        |
| 5   |                      | 93.3                       | 933                    | 106           | 905                      | 89                     | 3.0        |
| 6   |                      | 173.7                      | 1737                   | 539           | 1686                     | 69                     | 2.9        |
| 7   |                      | 1960                       | 19600                  | 6313          | 16660                    | 68                     | 15         |
| 8   |                      | 1340                       | 13400                  | 4649          | 11792                    | 65                     | 12         |
| 9   |                      | 1790                       | 17900                  | 2214          | 16468                    | 88                     | 8.0        |

According to the datasheet from Sigma-Aldrich for alginate lyase (Product No. A1603), the optimal PH for activity is PH6.3, thus viability and intactness of *K. pneumoniae* incubated in PH6.3 and PH7.0 phosphate buffered solution (PBS) were first tested. From the results listed in Table S11, PH6.3 had no obvious effect compared to PH7.0 at a certain concentration of alginate lyase. Subsequently, *S. aureus*, *K. pneumoniae*, and *P. aeruginosa* in PH 6.3 PBS of different alginate lyase concentrations were tested. The optimal release condition was set PH6.3 PBS of 0.1 unit/mL alginate lyase.

**Table S3** Viabilities of released bacteria after alginate lyase treatment at different concentrations in PBS with different PHs.

| No. | Species              | Abundance (CFU/mL) | PH          | Alginate lyase concentration | Viability <sup>a)</sup> | Intactness <sup>b)</sup> |
|-----|----------------------|--------------------|-------------|------------------------------|-------------------------|--------------------------|
| 1   | <i>K. pneumoniae</i> | 9.6e5              | 6.3, 10 min | 0 (NC)                       | 99.0%                   | 99.8%                    |
|     |                      |                    |             | 0.1 unit/mL                  | 98.9%                   | 99.3%                    |
|     |                      |                    |             | 0.25 unit/mL                 | 98.7%                   | 88.0%                    |
|     |                      |                    |             | 0.5 unit/mL                  | 98.4%                   | 87.6%                    |
|     |                      |                    |             | 0 (NC)                       | 99.4%                   | 99.8%                    |
|     |                      |                    |             | 0.1 unit/mL                  | 95.1%                   | 99.5%                    |
|     |                      |                    |             | 0.25 unit/mL                 | 93.8%                   | 93.3%                    |
| 1   | <i>K. pneumoniae</i> | 9.6e5              | 6.3, 30 min | 0.5 unit/mL                  | 92.6%                   | 93.2%                    |
|     |                      |                    |             | 0 (NC)                       | 99.0%                   | 99.6%                    |
|     |                      |                    |             | 0.1 unit/mL                  | 98.8%                   | 92.5%                    |
|     |                      |                    |             | 0.25 unit/mL                 | 98.8%                   | 60.3%                    |
|     |                      |                    |             | 0.5 unit/mL                  | 98.7%                   | 59.8%                    |
|     |                      |                    |             | 0 (NC)                       | 97.8%                   | 99.8%                    |
|     |                      |                    |             | 0.1 unit/mL                  | 96.2%                   | 97.8%                    |
| 1   | <i>K. pneumoniae</i> | 9.6e5              | 7.0, 10 min | 0.25 unit/mL                 | 96.4%                   | 80.8%                    |
|     |                      |                    |             | 0.5 unit/mL                  | 95.6%                   | 74.5%                    |
|     |                      |                    |             | 0 (NC)                       | 95.3%                   | 98.4%                    |
|     |                      |                    |             | 0.1 unit/mL                  | 95.3%                   | 97.5%                    |
|     |                      |                    |             | 0.25 unit/mL                 | 95.7%                   | 64.4%                    |
|     |                      |                    |             | 0.5 unit/mL                  | 93.1%                   | 33.1%                    |
|     |                      |                    |             | 0 (NC)                       | 92.6%                   | 94.7%                    |
| 2   | <i>S. aureus</i>     | 1.05e6             | 6.3         | 0.1 unit/mL                  | 93.7%                   | 94.0%                    |
|     |                      |                    |             | 0.25 unit/mL                 | 94.8%                   | 58.4%                    |
|     |                      |                    |             | 0.5 unit/mL                  | 93.3%                   | 34.4%                    |
|     |                      |                    |             | 0 (NC)                       | 92.5%                   | 97.0%                    |
|     |                      |                    |             | 0.1 unit/mL                  | 92.9%                   | 85.5%                    |
|     |                      |                    |             | 0.25 unit/mL                 | 94.8%                   | 57.6%                    |
|     |                      |                    |             | 0.5 unit/mL                  | 94.5%                   | 32.2%                    |
| 2   | <i>K. pneumonia</i>  | 8.3e5              | 6.3         | 0 (NC)                       | 99.5%                   | 99.6%                    |
|     |                      |                    |             | 0.1 unit/mL                  | 99.7%                   | 98.4%                    |
|     |                      |                    |             | 0.25 unit/mL                 | 99.7%                   | 94.0%                    |
|     |                      |                    |             | 0.5 unit/mL                  | 99.6%                   | 94.4%                    |
|     |                      |                    |             | 0 (NC)                       | 98.0%                   | 99.8%                    |
|     |                      |                    |             | 0.1 unit/mL                  | 98.6%                   | 98.5%                    |
|     |                      |                    |             | 0.25 unit/mL                 | 98.4%                   | 95.0%                    |
| 3   | <i>K. pneumonia</i>  | 8.3e5              | 6.3         | 0.5 unit/mL                  | 99.8%                   | 95.6%                    |
|     |                      |                    |             | 0 (NC)                       | 99.4%                   | 99.8%                    |
|     |                      |                    |             | 0.1 unit/mL                  | 95.1%                   | 99.5%                    |
|     |                      |                    |             | 0.25 unit/mL                 | 93.8%                   | 93.2%                    |
|     |                      |                    |             | 0.5 unit/mL                  | 92.6%                   | 93.2%                    |
|     |                      |                    |             | 0 (NC)                       | 96.8%                   | 97.4%                    |
|     |                      |                    |             | 0.1 unit/mL                  | 97.5%                   | 98.2%                    |
| 1   | <i>P. aeruginosa</i> | 1.08e6             | 6.3         | 0.25 unit/mL                 | 96.0%                   | 87.5%                    |
|     |                      |                    |             | 0.5 unit/mL                  | 94.0%                   | 61.2%                    |
|     |                      |                    |             | 0 (NC)                       | 94.5%                   | 99.2%                    |
|     |                      |                    |             | 0.1 unit/mL                  | 95.4%                   | 95.2%                    |
|     |                      |                    |             | 0.25 unit/mL                 | 95.4%                   | 97.8%                    |
|     |                      |                    |             | 0.5 unit/mL                  | 94.6%                   | 60.3%                    |
|     |                      |                    |             | 0 (NC)                       | 83.4%                   | 97.9%                    |
| 3   | <i>P. aeruginosa</i> | 4.38e5             | 6.3         | 0.1 unit/mL                  | 87.5%                   | 86.9%                    |
|     |                      |                    |             | 0.25 unit/mL                 | 87.4%                   | 59.0%                    |
|     |                      |                    |             | 0.5 unit/mL                  | 87.3%                   | 51.2%                    |

<sup>a)</sup> viability=percentage of SYTO9-positive singlets out of all singlets for live (w/o heat killing); <sup>b)</sup> intactness=percentage of PI-positive singlets out of SYTO9-positive singlets of dead (w/ heat killing); The heat killing condition: 95°C for 15 min with shaking of 1000 rpm on a dry bath/block heater (ThermoMixer C, Eppendorf, Germany)

**Table S4** Sequences of primers/probes used in this study.

| Pathogen             | Primer/Probe ID | Sequences                                          |
|----------------------|-----------------|----------------------------------------------------|
| <i>S. aureus</i>     | SA F3-6         | ACAAAGGGCAGCGAAACC                                 |
|                      | SA B3-6         | ACGGCTAGCTCCTAAAAGGT                               |
|                      | SA FIP-6        | GCTTCATGTAGTCGAGTTGCAGACTGGTCAAGCAAATCCCATAAAGTTG  |
|                      | SA BIP-6        | GCTACGGTGAATACGTTCCCGGTACTCCACCGGCTTCGG            |
|                      | SA LF-6         | CAATCCGAACTGAGAA                                   |
|                      | SA LB-6         | TCTTGATACACCCGCCGTCA                               |
|                      | SA-BIP-6-HEX    | /5HEX/TGCTACGGTGAATACGTTCCCGGTACTCCACCGGCTTCGG     |
|                      | SA-Bd-6-FQ      | CCGGGAACGTATTCACCGTAGCA/3IABkFQ/                   |
| <i>K. pneumoniae</i> | KP F3-2         | GCAACTCGACTCCATGAA                                 |
|                      | KP B3-2         | CGACTTCACCCAGTCAT                                  |
|                      | KP FIP-2        | CAAGGCCCGGAACGTATTCGGAATCGCTAGTAATCGTAG            |
|                      | KP BIP-2        | ACACCGCCCGTCACACCATAAAGTGGTAAGCGCCCTCC             |
|                      | KP LF-2         | CACCGTAGCATTCTGA                                   |
|                      | KP LB-2         | GGGAGTGGTTGCAAAGAAG                                |
|                      | KP-BIP-2-Cy5    | /5Cy5/ACACCGCCCGTCACACCATAAAGTGGTAAGCGCCCTCC       |
|                      | KP-Bd-2-RQ      | ATGGTGTGACGGGCGGTGT/3IAbRQSp/                      |
| <i>P. aeruginosa</i> | PA F3-8         | AAGCGGTGGAGCATGTG                                  |
|                      | PA B3-8         | GTGCTGGTAACTAAGGACAAGG                             |
|                      | PA FIP-8        | AGGCACCAATCCATCTCTGGAAAGGAAGCAACGCGAAGAACCT        |
|                      | PA BIP-8        | GGAACTCAGACACAGGTGCTGCTTGCCTCGTTACGGGA             |
|                      | PA LF-8         | AGCATGTCAAGCCAGGTA                                 |
|                      | PA LB-8         | CTGTCGTCAGCTCGTGTCTGTG                             |
|                      | PA-8-FIP-FAM    | /56FAM/AGGCACCAATCCATCTCTGGAAAGGAAGCAACGCGAAGAACCT |
|                      | PA-8-Fd-FQ      | CTTCCAGAGATGGATTGGTGCCT/3IABkFQ/                   |
| <i>C. albicans</i>   | CA F3-1         | GGTCCAGACACAATAAGGATT                              |
|                      | CAB3-1          | CTCAAACCTCCATCGACTTG                               |
|                      | CA FIP-1        | CCAACTAAGAACGGCCATGCGACAGATTGAGAGCTCTTTCTTGA       |
|                      | CA BIP-1        | GGAGTGATTTGTCTGCTTAATTGCGTGACTATACCAGCAAATGC       |
|                      | CA LF-1         | CCACCACCCACAAAA                                    |
|                      | CA LB-1         | ACGAACGAGACCTTAACCTACT                             |
|                      | CA-1-FIP-Cy5    | /5Cy5/CCAACTAAGAACGGCCATGCGACAGATTGAGAGCTCTTTCTTGA |
|                      | CA-1-F1c-RQ     | GCATGGCCGTTCTTAGTTGG/3IAbRQSp/                     |
| Herpes Simplex Virus | HSV-F           | CATCACCGACCCGGAGAGGGAC                             |
|                      | HSV-R           | GGGCCAGGCGCTTGTGGTGTA                              |
|                      | HSV-P           | /56FAM/CCGCCGAACTGAGCAGACACCCGCGC/3IABkFQ/         |

**Table S5** dLAMP signals of bacterial detection obtained by EM-, centrifugation-based sample preparation (EM, C), unconcentrated raw sampling approach (R), and abundances derived from actual CFU counts, for 10 mL LB spiked samples.

| No. | Species              | Counted abundance (CFU/mL) | dLAMP signal (copies/ $\mu$ L) |         |        | Normalized dLAMP signal (copies/ $\mu$ L) |          |         |
|-----|----------------------|----------------------------|--------------------------------|---------|--------|-------------------------------------------|----------|---------|
|     |                      |                            | EM                             | C       | R      | EM                                        | C        | R       |
| 10  |                      | 0 (NC)                     | 1.6                            | 0.7     | 0.8    | -                                         | -        | -       |
| 11  |                      | 0 (NC)                     | 1.9                            | 0.5     | 0.7    | -                                         | -        | -       |
| 12  |                      | 0 (NC)                     | 1.7                            | 0.7     | 0.6    | -                                         | -        | -       |
| 13  |                      | 0.63                       | 2.0                            | 0.5     | 0.6    | 3.17                                      | 0.79     | 0.95    |
| 14  |                      | 0.4                        | 2.3                            | 0.4     | 0.6    | 5.75                                      | 1.00     | 1.50    |
| 15  |                      | 0.7                        | 2.6                            | 0.6     | 0.4    | 3.71                                      | 0.86     | 0.57    |
| 16  |                      | 5.6                        | 13.3                           | 1.0     | 0.3    | 23.75                                     | 1.79     | 0.54    |
| 17  |                      | 6.3                        | 15.3                           | 0.7     | 0.9    | 24.29                                     | 1.11     | 1.43    |
| 18  |                      | 4.5                        | 15.0                           | 1.5     | 0.3    | 33.33                                     | 3.33     | 0.67    |
| 19  |                      | 5.1                        | 15.1                           | -       | -      | 29.61                                     | -        | -       |
| 20  |                      | 87                         | 210.6                          | 2.6     | -      | 243.47                                    | 3.88     | -       |
| 21  | <i>S. aureus</i>     | 88                         | 83.8                           | 1.4     | -      | 95.77                                     | 1.60     | -       |
| 22  |                      | 129                        | 255.6                          | 7.5     | -      | 198.14                                    | 5.81     | -       |
| 23  |                      | 140                        | -                              | -       | 0.9    | -                                         | -        | 0.64    |
| 24  |                      | 85.8                       | -                              | -       | 0.4    | -                                         | -        | 0.47    |
| 25  |                      | 81                         | -                              | -       | 1.8    | -                                         | -        | 2.22    |
| 26  |                      | 3330                       | 4803.2                         | -       | -      | 1442.40                                   | -        | -       |
| 27  |                      | 342                        | 567.6                          | 4.0     | -      | 1659.65                                   | 11.70    | -       |
| 28  |                      | 865                        | 1261.2                         | 59.5    | 3.2    | 1458.03                                   | 88.81    | 3.70    |
| 29  |                      | 875                        | 1663.4                         | 16.5    | 3.6    | 1901.03                                   | 18.86    | 4.11    |
| 30  |                      | 1290                       | 963.3                          | 83.0    | 1.4    | 746.74                                    | 64.34    | 1.09    |
| 31  |                      | 858                        | 1544.6                         | 151.6   | -      | 1800.23                                   | 176.69   | -       |
| 32  |                      | 811                        | -                              | 104.4   | -      | -                                         | 128.73   | -       |
| 10  |                      | 0 (NC)                     | 2.9                            | 2.2     | 0.5    | -                                         | -        | -       |
| 11  |                      | 0 (NC)                     | 4.95                           | 0.19    | 0.3    | -                                         | -        | -       |
| 12  |                      | 0 (NC)                     | 3.75                           | 0.19    | 0.2    | -                                         | -        | -       |
| 13  |                      | 0.4                        | 9.4                            | 2.4     | 0.2    | 23.43                                     | 6.00     | 0.50    |
| 14  |                      | 2                          | 19.1                           | 5.4     | 1.9    | 9.55                                      | 2.70     | 0.95    |
| 15  |                      | 1.7                        | -                              | -       | 2.8    | -                                         | -        | 1.65    |
| 16  |                      | 1.2                        | -                              | 4       | 2.0    | -                                         | 3.33     | 1.67    |
| 17  |                      | 0.9                        | 18.3                           | -       | -      | 20.33                                     | -        | -       |
| 18  |                      | 5.4                        | 347.5                          | 29.8    | 0.2    | 643.52                                    | 55.19    | 0.37    |
| 19  |                      | 11.4                       | 248.0                          | 28.8    | 2.2    | 217.54                                    | 25.26    | 1.93    |
| 20  |                      | 9.4                        | 412.0                          | 46.6    | -      | 438.30                                    | 49.57    | -       |
| 21  | <i>K. pneumoniae</i> | 17                         | -                              | 58.2    | 5.0    | -                                         | 34.34    | 2.94    |
| 22  |                      | 8.6                        | -                              | 7.5     | 1.7    | -                                         | 8.72     | 1.98    |
| 23  |                      | 34                         | 1046.3                         | 333.9   | 30.7   | 3077.35                                   | 982.06   | 90.29   |
| 24  |                      | 36.5                       | 1368.3                         | 105.1   | 24.8   | 3748.77                                   | 287.95   | 67.95   |
| 25  |                      | 94                         | 3610.0                         | 599.4   | 43.7   | 3840.43                                   | 637.66   | 46.49   |
| 26  |                      | 133                        | -                              | 460.6   | 114.5  | -                                         | 346.32   | 86.09   |
| 27  |                      | 60.8                       | -                              | 176.5   | 16.1   | -                                         | 290.30   | 26.48   |
| 28  |                      | 340                        | 16877.0                        | 9684.5  | -      | 49638.24                                  | 28483.82 | -       |
| 29  |                      | 365                        | 26481.0                        | 8680.7  | 227.6  | 72550.68                                  | 23782.74 | 623.56  |
| 30  |                      | 940                        | 44507.3                        | 9554.7  | 1112.0 | 47348.19                                  | 10164.57 | 1182.98 |
| 31  |                      | 1330                       | -                              | 10416.8 | 1129.2 | -                                         | 7832.18  | 849.02  |
| 32  |                      | 608                        | -                              | 5247.7  | 138.4  | -                                         | 8631.09  | 227.63  |
| 10  |                      | 0 (NC)                     | 10.5                           | 3.9     | 3.4    | -                                         | -        | -       |
| 11  |                      | 0 (NC)                     | 8.0                            | 1.9     | 2.4    | -                                         | -        | -       |
| 12  |                      | 0 (NC)                     | 6.9                            | 1.3     | 1.1    | -                                         | -        | -       |
| 13  |                      | 0.9                        | 23.4                           | 3.4     | 3.2    | 26.00                                     | 3.78     | 3.56    |
| 14  |                      | 0.9                        | 55.8                           | 1.8     | 0.9    | 62.00                                     | 2.00     | 1.00    |
| 15  |                      | 1.1                        | 28.2                           | 3.4     | 2.1    | 25.18                                     | 3.04     | 1.88    |
| 16  |                      | 0.9                        | 31.5                           | -       | -      | 35.00                                     | -        | -       |
| 17  |                      | 9                          | 204.4                          | 6.0     | 2.6    | 227.11                                    | 6.67     | 2.89    |
| 18  |                      | 9.3                        | 335.7                          | 9.3     | 2.0    | 360.97                                    | 10.00    | 2.15    |
| 19  | <i>P. aeruginosa</i> | 16.3                       | 466.1                          | 10.7    | 3.3    | 285.95                                    | 6.56     | 2.02    |
| 20  |                      | 12.4                       | 153.4                          | 22.6    | 1.3    | 123.71                                    | 18.23    | 1.05    |
| 21  |                      | 196                        | 1676.5                         | 47.7    | 5.1    | 855.36                                    | 24.34    | 2.60    |
| 22  |                      | 174                        | 2121.0                         | 104.9   | 8.3    | 1218.97                                   | 60.29    | 4.77    |
| 23  |                      | 151                        | 2392.1                         | 93.0    | 10.1   | 1584.83                                   | 61.59    | 6.69    |
| 24  |                      | 107                        | 866.7                          | -       | -      | 810.00                                    | -        | -       |
| 25  |                      | 1337                       | 19947.0                        | 3794.3  | 156.4  | 14922.57                                  | 2838.56  | 117.00  |
| 26  |                      | 1787                       | 42785.3                        | 2631.4  | 234.5  | 23946.55                                  | 1472.77  | 131.25  |
| 27  |                      | 850                        | 15814.0                        | 1393.4  | 124.3  | 18604.71                                  | 1639.29  | 146.24  |
| 28  |                      | 1183                       | 20686.0                        | -       | -      | 17486.05                                  | -        | -       |

**Table S6** dLAMP signals of bacteria detection obtained by EM-based sample preparation and abundances derived from actual CFU counts, for 10 mL fetal bovine serum (FBS) spiked samples.

| No. | Species              | Counted abundance (CFU/mL) | dLAMP signal (copies/ $\mu$ L) |                                           |
|-----|----------------------|----------------------------|--------------------------------|-------------------------------------------|
|     |                      |                            | dLAMP signal (copies/ $\mu$ L) | Normalized dLAMP signal (copies/ $\mu$ L) |
| 33  |                      | 0 (NC)                     | 0.3                            | -                                         |
| 34  |                      | 0 (NC)                     | 0.2                            | -                                         |
| 35  |                      | 0 (NC)                     | 0.6                            | -                                         |
| 36  | <i>S. aureus</i>     | 13.9                       | 3.6                            | 2.59                                      |
| 37  |                      | 18.2                       | 7.7                            | 4.23                                      |
| 38  |                      | 14.1                       | 2.6                            | 1.84                                      |
| 39  |                      | 141                        | 17.8                           | 12.62                                     |
| 40  |                      | 149                        | 36.7                           | 24.63                                     |
| 41  |                      | 153                        | 36.7                           | 23.99                                     |
| 33  |                      | 0 (NC)                     | 0.5                            | -                                         |
| 34  |                      | 0 (NC)                     | 0.7                            | -                                         |
| 35  |                      | 0 (NC)                     | 0.7                            | -                                         |
| 36  | <i>K. pneumoniae</i> | 23.1                       | 108.0                          | 46.73                                     |
| 37  |                      | 26.4                       | 68.7                           | 26.01                                     |
| 38  |                      | 26.2                       | 216.9                          | 82.77                                     |
| 39  |                      | 215                        | 595.9                          | 277.16                                    |
| 40  |                      | 234                        | 945.1                          | 403.89                                    |
| 41  |                      | 209                        | 309.9                          | 148.25                                    |
| 29  |                      | 0 (NC)                     | 0.9                            | -                                         |
| 30  |                      | 0 (NC)                     | 0.5                            | -                                         |
| 31  |                      | 0 (NC)                     | 0.7                            | -                                         |
| 32  | <i>P. aeruginosa</i> | 18.6                       | 41.1                           | 22.10                                     |
| 33  |                      | 6.9                        | 12.6                           | 18.26                                     |
| 34  |                      | 4.8                        | 17.6                           | 36.67                                     |
| 35  |                      | 30.8                       | 74.9                           | 243.02                                    |
| 36  |                      | 235                        | 238.9                          | 101.66                                    |
| 37  |                      | 224                        | 314.6                          | 140.45                                    |
| 38  |                      | 169                        | 473.9                          | 280.41                                    |

**Table S7** dLAMP signals of detection of fungi obtained by EM-based sample preparation and abundances derived from actual CFU counts of *C. albicans*, for 10 mL brain heart infusion broth (BHIB) spiked samples.

| No. | Abundance (CFU/mL) | dLAMP signal (copies/ $\mu$ L) | No. | Abundance (CFU/mL) | dLAMP signal (copies/ $\mu$ L) | Normalized dLAMP signal (copies/ $\mu$ L) |
|-----|--------------------|--------------------------------|-----|--------------------|--------------------------------|-------------------------------------------|
| 1   | 0 (NC)             | 2.0                            | 11  | 0.35               | 5.3                            | 15.14                                     |
| 2   | 0 (NC)             | 1.9                            | 12  | 0.6                | 10.2                           | 17.00                                     |
| 3   | 0 (NC)             | 2.0                            | 13  | 0.35               | 8.2                            | 23.43                                     |
| 4   | 0 (NC)             | 1.0                            | 14  | 0.55               | 7.3                            | 13.27                                     |
| 5   | 0 (NC)             | 0.6                            | 15  | 13.4               | 5339.0                         | 3984.33                                   |
| 6   | 0 (NC)             | 0.5                            | 16  | 6.4                | 6451.5                         | 10079.84                                  |
| 7   | 0 (NC)             | 1.6                            | 17  | 4.9                | 3386.0                         | 6910.20                                   |
| 8   | 0 (NC)             | 0.5                            | 18  | 8.3                | 816.5                          | 983.73                                    |
| 9   | 0 (NC)             | 1.0                            | 19  | 6.8                | 7392.3                         | 10871.03                                  |
| 10  | 0 (NC)             | 1.2                            |     |                    |                                |                                           |

**Table S8** dLAMP signals of bacteria detection obtained by EM-based sample preparation and CFU counts of spiked bacteria, for 100 mL or 500 mL bottled drinking water spiked samples.

| No. | Species              | CFU counts (total No.) | dLAMP signal (copies/ $\mu$ L) |                 |
|-----|----------------------|------------------------|--------------------------------|-----------------|
|     |                      |                        | Volume @100 mL                 | Volume @ 500 mL |
| 42  |                      | 0 (NC)                 |                                | 0.1             |
| 43  |                      | 0 (NC)                 |                                | 0.2             |
| 44  |                      | 0 (NC)                 |                                | 0.4             |
| 45  | <i>S. aureus</i>     | 9                      | 0.9                            | 0.8             |
| 46  |                      | 16.9                   | 1.4                            | 0.8             |
| 47  |                      | 21                     | 2.4                            | 1.8             |
| 48  |                      | 11.8                   | 2.0                            | 1.1             |
| 49  |                      | 8.8                    | 1.1                            | 0.5             |
| 42  |                      |                        | 0 (NC)                         |                 |
| 43  |                      | 0 (NC)                 |                                | 1.2             |
| 44  |                      | 0 (NC)                 |                                | 1.4             |
| 45  | <i>K. pneumonia</i>  | 21                     | 57.2                           | 3.6             |
| 46  |                      | 24.9                   | 12.7                           | 5.3             |
| 47  |                      | 18.1                   | 9.5                            | 36.8            |
| 48  |                      | 9.9                    | 3.1                            | 1.9             |
| 49  |                      | 9                      | 1.2                            | 1.1             |
| 39  |                      | 0 (NC)                 |                                | 0.8             |
| 40  |                      | 0 (NC)                 |                                | 1.2             |
| 41  |                      | 0 (NC)                 |                                | 1.1             |
| 42  | <i>P. aeruginosa</i> | 23                     | 3.0                            | 9.3             |
| 43  |                      | 23.2                   | 4.2                            | 8.2             |
| 44  |                      | 19.6                   | 10.5                           | 2.9             |
| 45  |                      | 13.5                   | 1.0                            | 6.1             |
| 46  |                      | 9.1                    | 15.6                           | 4.4             |

**Table S9** dLAMP signals of multiplex detection of bacteria obtained by EM-based sample preparation and abundances derived from actual CFU counts, for 10 mL LB spiked samples.

| No. | Abundances (CFU/mL) |                     |                      | dLAMP signals (copies/ $\mu$ L) |                     |                      |
|-----|---------------------|---------------------|----------------------|---------------------------------|---------------------|----------------------|
|     | <i>S. aureus</i>    | <i>K. pneumonia</i> | <i>P. aeruginosa</i> | <i>S. aureus</i>                | <i>K. pneumonia</i> | <i>P. aeruginosa</i> |
| 1   | 0 (NC)              | 0 (NC)              | 0 (NC)               | 0.8                             | 3.3                 | 2.8                  |
| 2   | 0 (NC)              | 0 (NC)              | 0 (NC)               | 0.3                             | 1.7                 | 0.5                  |
| 3   | 0 (NC)              | 0 (NC)              | 0 (NC)               | 1.4                             | 5.4                 | 5.1                  |
| 4   | 21                  | 151                 | 46                   | 9.5                             | 3202.8              | 395.1                |
| 5   | 8                   | 72                  | 65                   | 5.0                             | 1479.9              | 388.0                |
| 6   | 13                  | 150                 | 62                   | 6.6                             | 4715.1              | 580.2                |
| 7   | 20                  | 129                 | 43                   | 6.5                             | 2747.6              | 566.8                |
| 8   | 162                 | 151                 | 46                   | 96.5                            | 2814.3              | 351.1                |
| 9   | 87                  | 72                  | 65                   | 108.7                           | 1565.6              | 657.4                |
| 10  | 101                 | 150                 | 62                   | 82.7                            | 4526.8              | 599.1                |
| 11  | 156                 | 129                 | 43                   | 105.0                           | 2455.9              | 661.9                |

**Table S10** dLAMP signals of multiplex detection of bacteria obtained by EM-based sample preparation and abundances derived from actual CFU counts, for 10 mL FBS spiked samples.

| No. | Abundances (CFU/mL) |                     |                      | dLAMP signals (copies/ $\mu$ L) |                     |                      |
|-----|---------------------|---------------------|----------------------|---------------------------------|---------------------|----------------------|
|     | <i>S. aureus</i>    | <i>K. pneumonia</i> | <i>P. aeruginosa</i> | <i>S. aureus</i>                | <i>K. pneumonia</i> | <i>P. aeruginosa</i> |
| 12  | 0 (NC)              | 0 (NC)              | 0 (NC)               | 0.1                             | 0.3                 | 1.1                  |
| 13  | 0 (NC)              | 0 (NC)              | 0 (NC)               | 0.1                             | 0.2                 | 0.0                  |
| 14  | 0 (NC)              | 0 (NC)              | 0 (NC)               | 0.0                             | 0.0                 | 0.2                  |
| 15  | 13                  | 151                 | 62                   | 2.6                             | 395.1               | 413.2                |
| 16  | 13                  | 150                 | 143                  | 6.9                             | 988.5               | 727.8                |
| 17  | 20                  | 129                 | 43                   | 2.3                             | 607.1               | 60.9                 |
| 18  | 101                 | 151                 | 62                   | 7.2                             | 270.4               | 277.1                |
| 19  | 159                 | 150                 | 143                  | 17.0                            | 943.4               | 673.0                |
| 20  | 156                 | 129                 | 43                   | 10.6                            | 867.5               | 71.7                 |

**Table S11** dLAMP signals of multiplex detection of bacteria obtained by EM-based sample preparation and abundances derived from actual CFU counts, for 100 mL or 500 mL bottled drinking water spiked samples.

| No.             | Abundances (CFU/mL) |                     |                      | dLAMP signals (copies/ $\mu$ L) |                     |                      |
|-----------------|---------------------|---------------------|----------------------|---------------------------------|---------------------|----------------------|
|                 | <i>S. aureus</i>    | <i>K. pneumonia</i> | <i>P. aeruginosa</i> | <i>S. aureus</i>                | <i>K. pneumonia</i> | <i>P. aeruginosa</i> |
| 21              | 0 (NC)              | 0 (NC)              | 0 (NC)               | 0.8                             | 0.8                 | 0.2                  |
| 22              | 0 (NC)              | 0 (NC)              | 0 (NC)               | 0.9                             | 0.5                 | 0.0                  |
| 23              | 0 (NC)              | 0 (NC)              | 0 (NC)               | 0.6                             | 0.6                 | 0.8                  |
| Volume @ 100 mL |                     |                     |                      |                                 |                     |                      |
| 24              | 12.3                | 19.3                | 6.1                  | 0.7                             | 2.4                 | 1.4                  |
| 25              | 10.7                | 10.3                | 8.7                  | 3.9                             | 15.0                | 10.3                 |
| 26              | 9.6                 | 19.4                | 8.5                  | 0.3                             | 37.8                | 7.7                  |
| 27              | 12.5                | 4.3                 | 4.2                  | 0.8                             | 8.7                 | 22.5                 |
| 28              | 7.6                 | 4.4                 | 6                    | 0.3                             | 6.6                 | 11.5                 |
| Volume @ 500 mL |                     |                     |                      |                                 |                     |                      |
| 29              | 12.3                | 19.3                | 6.1                  | 1.6                             | 2.9                 | 1.8                  |
| 30              | 10.7                | 10.3                | 8.7                  | 3.9                             | 17.8                | 14.2                 |
| 31              | 9.6                 | 19.4                | 8.5                  | 2.4                             | 6.8                 | 10.5                 |
| 32              | 12.5                | 4.3                 | 4.2                  | 0.6                             | 6.1                 | 4.2                  |
| 33              | 8.8                 | 10.1                | 9.5                  | 1.9                             | 9.2                 | 4.8                  |



**Table S12** dPCR signals of HSV detection obtained by EM-, ultracentrifugation-based sample preparation (EM, UC), unconcentrated raw sampling approach (R), and abundances derived from plaque-forming unit (PFU) counts combining serial dilution factors, for 10 mL viral spent media samples.

| No. | Abundance (PFU/mL) | dPCR signal (copies/ $\mu$ L) |       |       |
|-----|--------------------|-------------------------------|-------|-------|
|     |                    | EM                            | UC    | R     |
| 1   | 0 (NC)             | 0.1                           | 0.1   | 0.1   |
| 2   | 0 (NC)             | 0.0                           | 0.0   | 0.1   |
| 3   | 0 (NC)             | 0.0                           | 0.0   | 0.1   |
| 4   | 1                  | 0.5                           | 0.2   | 0.3   |
| 5   | 1                  | 0.5                           | 0.0   | 0.2   |
| 6   | 1                  | 0.2                           | 0.1   | 0.0   |
| 7   | 10                 | 18.5                          | 0.2   | 0.0   |
| 8   | 10                 | 56.3                          | 0.5   | 0.1   |
| 9   | 10                 | 21.8                          | 0.0   | 0.1   |
| 10  | 100                | 165.4                         | 0.6   | 0.2   |
| 11  | 100                | 152.5                         | 0.5   | 0.1   |
| 12  | 100                | 160.2                         | 0.2   | 0.1   |
| 13  | 1000               | 2740.5                        | 0.0   | 0.2   |
| 14  | 1000               | 1859.6                        | 0.7   | 0.0   |
| 15  | 1000               | 2439.6                        | 0.0   | 0.0   |
| 16  | 10000              | 29493.1                       | 429.3 | 172.5 |
| 17  | 10000              | 21860.3                       | 286.9 | 219.5 |
| 18  | 10000              | 28681.1                       | 401.9 | 165.8 |

**Table S13** dLAMP signals of detecting multiplex spiking samples containing *S. aureus*, *K. Pneumoniae*, and *P. aeruginosa*, using EM-PERFECT filters stored for different durations.

| No. | Day of storage | Abundance (CFU/mL) |                  |                   | dLAMP signals (copies/ $\mu$ L) |                  |                   | Normalized dLAMP signals (copies/ $\mu$ L) |                  |                   |
|-----|----------------|--------------------|------------------|-------------------|---------------------------------|------------------|-------------------|--------------------------------------------|------------------|-------------------|
|     |                | S.                 | K.               | P.                | S.                              | K.               | P.                | S.                                         | K.               | P.                |
|     |                | <i>aureus</i>      | <i>pneumonia</i> | <i>aeruginosa</i> | <i>aureus</i>                   | <i>pneumonia</i> | <i>aeruginosa</i> | <i>aureus</i>                              | <i>pneumonia</i> | <i>aeruginosa</i> |
| 1   | 7              |                    |                  |                   | 111.3                           | 1808.9           | 920.2             | 46.5                                       | 2871.3           | 724.6             |
| 2   | 6              |                    |                  |                   | 103.3                           | 2225.9           | 986.1             | 43.2                                       | 3533.2           | 776.5             |
| 3   | 5              |                    |                  |                   | 135.9                           | 1746.8           | 1049.0            | 56.8                                       | 2772.7           | 826.0             |
| 4   | 4              | 239                | 63               | 127               | 70.1                            | 3028.2           | 927.0             | 29.3                                       | 4806.7           | 729.9             |
| 5   | 3              |                    |                  |                   | 102.0                           | 2534.5           | 658.1             | 42.7                                       | 4023.0           | 518.2             |
| 6   | 2              |                    |                  |                   | 127.1                           | 1264.5           | 852.8             | 53.2                                       | 2165.9           | 671.5             |
| 7   | 1              |                    |                  |                   | 80.0                            | 2597.7           | 1111.5            | 33.5                                       | 4123.3           | 875.2             |
| 8   | 7              |                    |                  |                   | 63.7                            | 1769.6           | 509.2             | 37.0                                       | 876.0            | 337.2             |
| 9   | 6              |                    |                  |                   | 63.3                            | 1774.4           | 600.2             | 36.8                                       | 878.4            | 397.5             |
| 10  | 5              |                    |                  |                   | 61.3                            | 2133.9           | 801.3             | 35.6                                       | 1056.4           | 530.7             |
| 11  | 4              | 172                | 202              | 151               | 34.3                            | 1729.4           | 873.6             | 19.9                                       | 856.1            | 578.5             |
| 12  | 3              |                    |                  |                   | 27.2                            | 2185.9           | 860.5             | 15.8                                       | 1082.1           | 569.9             |
| 13  | 2              |                    |                  |                   | 72.6                            | 1888.3           | 765.9             | 42.2                                       | 934.8            | 507.2             |
| 14  | 1              |                    |                  |                   | 56.7                            | 2032.0           | 848.1             | 32.9                                       | 1005.9           | 561.7             |
| 15  | 7              |                    |                  |                   | 30.8                            | 704.3            | 701.1             | 18.1                                       | 323.0            | 369.0             |
| 16  | 6              |                    |                  |                   | 30.1                            | 523.2            | 802.3             | 17.6                                       | 240.0            | 422.3             |
| 17  | 5              |                    |                  |                   | 65.2                            | 1332.6           | 1155.8            | 38.1                                       | 611.3            | 608.3             |
| 18  | 4              | 171                | 218              | 190               | 33.2                            | 1030.7           | 1122.3            | 19.4                                       | 472.8            | 590.7             |
| 19  | 3              |                    |                  |                   | 73.8                            | 1522.6           | 1372.5            | 43.2                                       | 698.4            | 722.4             |
| 20  | 2              |                    |                  |                   | 41.2                            | 803.9            | 1017.9            | 24.1                                       | 368.8            | 535.7             |
| 21  | 1              |                    |                  |                   | 46.2                            | 758.6            | 1154.7            | 27.0                                       | 348.0            | 607.7             |
